# Supplementary material
Source: PubMed Central journal article supplement (PMC2957791)
Supplement: supmat.pdf [file supmat.pdf]

1 Supplementary Table 1: Sequences of FISH oligonucleotide probes.

| Gene name | Channel name | NCBI Accession | Nucleotide position | Sense Sequence                                 |
|-----------|--------------|----------------|---------------------|------------------------------------------------|
| CACNA1c   | Cav1.2       | NM_000719.4    | 1633                | GGATGAGGAGAAGCCCCGAAACATGAGCATGCCACCAGTGAGAC   |
| CACNA1g   | Cav3.1       | NM_198376.1    | 2270                | ACAAGCTGCTGGAGACACAGAGTACAGGTGCCTGCCAAAGCTCTT  |
| CACNA1h   | Cav3.2       | NM_001005407.1 | 6515                | CCCAGCCGACGAGGAGGTCAGCCACATCACCAGCTCCGCCTGCC   |
| HCN1      | HCN1         | NM_021072.1    | 503                 | ATACCAGTTGGAATCACATTCTTTACAGAGCAAACAACAACACCA  |
| HCN2      | HCN2         | NM_001194.2    | 1107                | GAGATCTTCCACATGACCTATGACCTGGCCAGCGCGGTGATGAGG  |
| HCN3      | HCN3         | NM_020897.1    | 2276                | GCCACCAGTGCCTGAGCCAGCCACACCCCGGGTCTCCAGCTTTC   |
| HCN4      | HCN4         | NM_005477.1    | 4031                | GACATCCTCAGGTTCTTTGCCACCCCTCTGTCTTTGTTT        |
| SCN1A     | Nav1.1       | NM_006920.3    | 812                 | GCAACCTGAGGAATAAATGTATAACAATGGCCTCCCACCAATGCTT |
| SCN3A     | Nav1.3       | NM_006922.2    | 3577                | GTTATAGAAATCCATGAAGGCAATAAGATAGACAGCTGCATGTCC  |
| SCN4A     | Nav1.4       | NM_000334.4    | 4980                | ATCGCCTACAGCCGCTCTCAGACTTCGTGGACACCTGCAGGAA    |
| SCN5A     | Nav1.5       | NM_198056.1    | 511                 | GTGCCACCAACGCCTTGATGTCCTCAGTCCCTCCACCCCATCC    |
| SCN8A     | Nav1.6       | NM_014191.1    | 216                 | GTTTCAAGCCTTTCACCCCTGAGTCACTGGCAAACATTGAGAGGC  |
| SCN9A     | Nav1.7       | NM_002977.1    | 4129                | GCCCTTATGAATGTTAGTCAAATGTGCGATGGAAAAACCTGAAA   |

2  
3 Probes not listed were reported previously (11). Sequences listed 5' to 3'.  
4
